# Supplementary material
Source: HighWire-hosted journal article supplement (https://openres.ersjournals.com/content/9/2/00566-2022)
Supplement: inline-supplementary-material-1 [file inline-supplementary-material-1.pdf]

**SUPPLEMENTAL MATERIAL 1**

**Reference equations for breathlessness during incremental cycle exercise**

**testing**

**Table A1.** Quasi Information Criterion for different models of breathlessness. Restricted cubic splines with knots placed at the 5<sup>th</sup>, 35<sup>th</sup> 65<sup>th</sup> and 95<sup>th</sup> percentiles are written as  $f(x)$ , i.e.  $f(\text{age})$  denotes the restricted cubic spline of age. Lower values indicate a better fitting model (bold).

| <b>Variables in model</b>                                                                          | <b>QIC Men</b> | <b>QIC Women</b> |
|----------------------------------------------------------------------------------------------------|----------------|------------------|
| $f(\%predW_{max})$                                                                                 | 25165          | 16911            |
| $f(\%predW_{max}) + f(\text{age})$                                                                 | 25011          | 16626            |
| $f(\%predW_{max}) + f(\text{age}) + f(\text{height})$                                              | 24963          | 16643            |
| $f(\%predW_{max}) + f(\text{age}) + \text{height}$                                                 | 24957          | 16632            |
| $f(\%predW_{max}) + f(\text{age}) + \text{height} + \text{weight}$                                 | 24962          | 16632            |
| $f(\%predW_{max}) + f(\text{age}) + \text{height} + f(\text{weight})$                              | 24953          | 16635            |
| $f(\%predW_{max}) + f(\text{age}) + \text{height} + f(\text{weight}) + \%predW_{max} * \text{age}$ | <b>24935</b>   | 16618            |
| $f(\%predW_{max}) + f(\text{age}) + \text{height} + \%predW_{max} * \text{age}$                    | <b>24939</b>   | <b>16614</b>     |
| $f(\%predW_{max}) + f(\text{age}) + \%predW_{max} * \text{age}$                                    | 24993          | <b>16608</b>     |

**Table A2.** Parameter estimates.

| <b>Parameter</b>  | <b>Men<br/>Estimate</b> | <b>Women<br/>Estimate</b> |
|-------------------|-------------------------|---------------------------|
| Intercept1        | 7.105994524             | 2.823125                  |
| Intercept2        | 8.466031224             | 4.014411                  |
| Intercept3        | 9.825848726             | 5.44524                   |
| Intercept4        | 11.61099378             | 7.29478                   |
| Intercept5        | 12.82448793             | 8.37268                   |
| Intercept6        | 13.9804337              | 9.643334                  |
| Intercept7        | 14.54650183             | 10.10118                  |
| Intercept8        | 15.83592933             | 11.62911                  |
| Intercept9        | 16.66525731             | 12.36298                  |
| Intercept10       | 18.4985691              | 13.74351                  |
| %predSpl_1        | -0.109693986            | -0.10982                  |
| %predSpl_2        | -0.000438626            | -0.00041                  |
| %predSpl_3        | 0.002369292             | 0.002344                  |
| AgeSpl_1          | 0.046027134             | 0.039811                  |
| AgeSpl_2          | -0.001408948            | 0.001028                  |
| AgeSpl_3          | 0.004509744             | -0.00237                  |
| Height            | -0.025396237            |                           |
| lastW_of_pred*Age | -0.000302552            | -0.0004                   |

**Table A3.** Spline knots

| <b>Variable</b>       | <b>Men</b>                  | <b>Women</b>                |
|-----------------------|-----------------------------|-----------------------------|
| Age                   | 21.92, 40.20, 52.33, 69.03  | 27.57, 48.37, 59.21, 73.48  |
| %predW <sub>max</sub> | 36.54, 62.51, 83.25, 108.84 | 36.75, 62.28, 83.70, 110.73 |

See Hastie, et al 2009 for calculation of splines.
